# Supplementary material for: Multidrug-Resistant Bacteria Isolated from Different Aquatic Environments in the North of Spain and South of France
Source: PubMed Central journal article supplement (PMC7565385; doi:10.3390/microorganisms8091425), 2020-09-16
Supplement: microorganisms-08-01425-s001.pdf [file microorganisms-08-01425-s001.pdf]

**Table S1.** Characteristics of sampling points in rivers (north of Spain and south of France). Data supplied by the Laboratory of Water and Environmental Health from University of Zaragoza.

| Code   | River               | Location (country)            | Cattle Exploitations |         |         |       |        |        |         |
|--------|---------------------|-------------------------------|----------------------|---------|---------|-------|--------|--------|---------|
|        |                     |                               | Porcine              | Poultry | Rabbits | Ovine | Bovine | Equine | Caprine |
| 1_ASE  | Segre               | Lleida (Spain)                | x                    | x       | -       | -     | -      | -      | -       |
| 2_ASE  | Noguera Ribagorzana | Lleida (Spain)                | x                    | x       | x       | -     | -      | -      | -       |
| 3_ASE  | Clamor Amarga       | Huesca (Spain)                | x                    | x       | x       | -     | x      | -      | -       |
| 4_ASE  | Cinca               | Huesca (Spain)                | x                    | x       | x       | -     | -      | -      | -       |
| 5_ASE  | Alcanadre           | Huesca (Spain)                | x                    | x       | -       | -     | -      | -      | -       |
| 6_ASE  | Flumen              | Huesca (Spain)                | x                    | x       | x       | -     | x      | -      | -       |
| 7_ASE  | Gállego             | Zaragoza (Spain)              | x                    | x       | -       | -     | x      | -      | -       |
| 8_ASE  | Arba de Riquel      | Zaragoza (Spain)              | x                    | -       | -       | x     | -      | -      | -       |
| 9_ASE  | Aragon subordan     | Huesca (Spain)                | -                    | -       | -       | x     | -      | x      | x       |
| 10_ASE | Aragón              | Navarra (Spain)               | x                    | x       | -       | -     | -      | x      | -       |
| 11_ASE | Irantzu             | Navarra (Spain)               | x                    | x       | -       | -     | -      | x      | -       |
| 12_ASE | Arakil              | Navarra (Spain)               | x                    | x       | -       | x     | -      | x      | x       |
| 13_ASE | Queies              | Zaragoza (Spain)              | x                    | x       | -       | -     | -      | x      | -       |
| 14_ASE | Alhama              | La Rioja (Spain)              | x                    | x       | -       | -     | -      | x      | -       |
| 15_ASE | Ega                 | Navarra (Spain)               | x                    | x       | -       | -     | -      | x      | -       |
| 16_ASE | Ega                 | Navarra (Spain)               | x                    | x       | -       | -     | -      | x      | -       |
| 17_ASE | Arga                | Navarra (Spain)               | x                    | x       | -       | x     | x      | x      | -       |
| 18_ASE | Arga                | Navarra (Spain)               | x                    | x       | -       | x     | x      | x      | -       |
| 19_ASE | Ebro                | Navarra (Spain)               | x                    | x       | x       | -     | -      | x      | -       |
| 20_ASE | Ebro                | Navarra (Spain)               | x                    | x       | x       | -     | -      | x      | -       |
| 21_ASC | Bidasoa             | Navarra (Spain)               | x                    | -       | -       | x     | -      | -      | x       |
| 22_ASC | Bidasoa             | Navarra (Spain)               | x                    | -       | -       | x     | -      | -      | x       |
| 23_ASA | L'Adour             | Pyrénées-atlantiques (France) | x                    | x       | -       | x     | -      | -      | x       |
| 24_ASA | Le Gabas            | Pyrénées-atlantiques (France) | x                    | x       | -       | -     | -      | -      | -       |
| 25_ASA | La Garonne          | Haute-Garonne (France)        | -                    | x       | x       | -     | -      | -      | -       |
| 26_ASA | La Save             | Haute-Garonne (France)        | x                    | x       | x       | -     | -      | -      | -       |
| 27_ASA | L'Echez             | Haute-Pyrénées (France)       | x                    | x       | x       | -     | -      | -      | -       |
| 28_ASA | La Baïse            | Haute-Pyrénées (France)       | x                    | x       | x       | -     | -      | -      | -       |

ASE: Surface water of the Ebro basin. ASC: Surface water of the Cantabrian basin. ASA / G: Surface water of the Adour-Garonne basin.

**Table S2.** Characteristics of sampling points for sewage water in the Navarra Region. Data supplied by the Laboratory of Water and Environmental Health from University of Zaragoza.

| Code     | Sampling point           | Location  | Inhabitants | River receiver | Type of Waste            |
|----------|--------------------------|-----------|-------------|----------------|--------------------------|
| 29_ARD1e | WWTP (influent)          | Estella   | 90.000      | Ega            | Urban                    |
| 30_ARD1s | WWTP (effluent)          |           |             |                | Urban                    |
| 31_ARD2e | WWTP (influent)          | Pamplona  | 550.000     | Arga           | Urban                    |
| 32_ARD2s | WWTP (effluent)          |           |             |                | Urban                    |
| 33_ARD3e | WWTP (influent)          | Tudela    | 82.500      | Ebro           | Urban                    |
| 34_ARD3s | WWTP (effluent)          |           |             |                | Urban                    |
| 35_ARD4e | WWTP (influent)          | Bera      | 4.900       | Bidasoa        | Urban                    |
| 36_ARD4s | WWTP (effluent)          |           |             |                | Urban                    |
| 37_ARH   | Hospital collector       | Tudela    | -           | Ebro           | Hospital                 |
| 38_ARM   | Slaughterhouse collector |           |             |                | Slaughterhouse (birds)   |
| 39_ARM   | Slaughterhouse collector | Bera      | -           | Bidasoa        | Slaughterhouse (ducks)   |
| 40_ARM   | Slaughterhouse collector | Murchante | -           | Ebro           | Slaughterhouse (rabbits) |

ARDe: Discharge of wastewater entering the treatment plant. ARDs: Discharge of wastewater leaving the treatment plant. ARH: Discharge of hospital wastewater. ARM: Discharge of slaughterhouse wastewater.

**Table S3.** Zone diameter breakpoints for the different antibiotics tested.

| Antibiotic       | Zone diameter breakpoints (mm) |       |      | Microorganism             | Guideline |
|------------------|--------------------------------|-------|------|---------------------------|-----------|
|                  | S                              | I     | R    |                           |           |
| Cefotaxime       | ≥ 26                           | 23-25 | ≤22  | <i>Enterobacteriaceae</i> | CLSI      |
| Ceftazidime      | ≥ 21                           | 18-20 | ≤17  |                           |           |
| Ceftriaxone      | ≥ 23                           | 20-22 | ≤19  |                           |           |
| Aztreonam        | ≥ 21                           | 18-20 | ≤17  |                           |           |
| Amox-clavulanate | ≥ 18                           | 14-17 | ≤13  |                           |           |
| Ertapenem        | ≥ 22                           | 19-21 | ≤18  |                           |           |
| Imipenem         | ≥ 23                           | 20-22 | ≤19  |                           |           |
| Meropenem        | ≥ 23                           | 20-22 | ≤19  |                           |           |
| Ertapenem        | ND                             | ND    | ND   | <i>P. aeruginosa</i>      | CLSI      |
| Imipenem         | ≥ 19                           | 19-18 | ≤15  |                           |           |
| Meropenem        | ≥ 19                           | 19-18 | ≤15  |                           |           |
| Ertapenem        | ND                             | ND    | ND   | <i>A. baumannii</i>       | CLSI      |
| Imipenem         | ≥ 22                           | 19-21 | ≤18  |                           |           |
| Meropenem        | ≥ 18                           | 15-17 | ≤14  |                           |           |
| Cefoxitin        | ≥ 22                           | -     | ≤21  | <i>S. aureus</i>          | CLSI      |
| Antibiotic       | MIC Breakpoints (µg/mL)        |       |      | Microorganism             | Guideline |
|                  | S                              | I     | R    |                           |           |
| Colistin         | ≤2                             | -     | ≥ 2  | <i>Enterobacteriaceae</i> | EUCAST    |
| Vancomycin       | ≤4                             | 8-16  | ≥ 32 | <i>E. faecium</i>         | CLSI      |
| Teicoplanin      | ≤8                             | 16    | ≥ 32 |                           |           |
